# Supplementary material for: The Arabidopsis thaliana Immunophilin ROF1 Directly Interacts with PI(3)P and PI(3,5)P2 and Affects Germination under Osmotic Stress
Source: PLOS journal article supplement (doi:10.1371/journal.pone.0048241), 2012-11-02

**FIGURE S4**

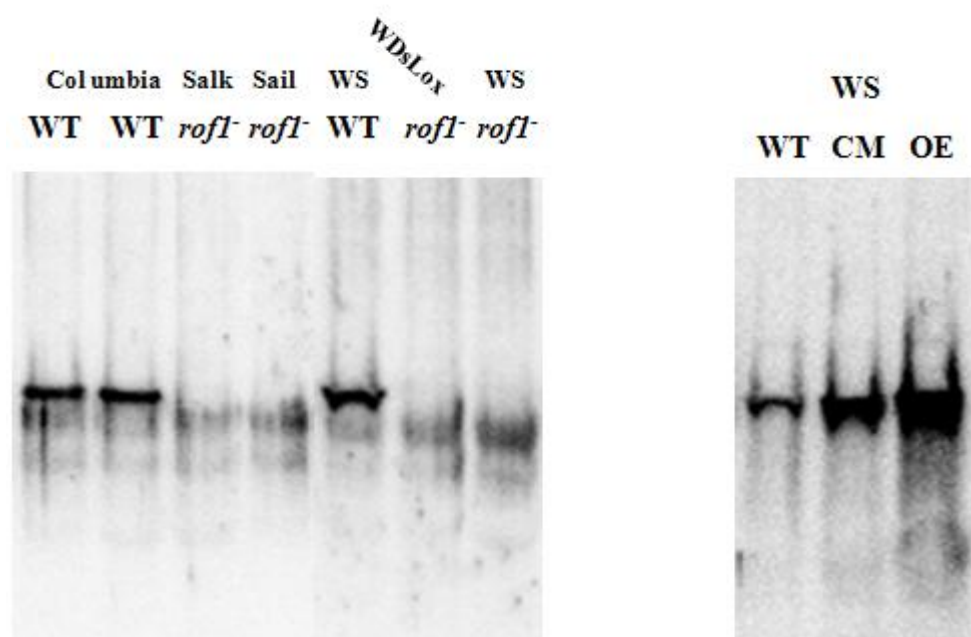

Supplement: S4 (10.1371/journal.pone.0048241.s004) [file journal.pone.0048241.s004]
